# Supplementary material for: Method for Dual Viral Vector Mediated CRISPR-Cas9 Gene Disruption in Primary Human Endothelial Cells
Source: PubMed Central journal article supplement (PMC5309830; doi:10.1038/srep42127), 2017-02-15

**Dual Viral Vector Mediated Persistent CRISPR-Cas9 Gene Disruption  
in Primary Human Endothelial Cells**

**Supplementary Information**

Haixia Gong<sup>1,2†</sup>, Menglin Liu<sup>1,2†</sup>, Jeff Klomp<sup>1,2</sup>, Bradley J Merrill<sup>3,4</sup>,

Jalees Rehman<sup>1,2,5\*</sup>, and Asrar B. Malik<sup>1,2\*</sup>

<sup>1</sup>Department of Pharmacology, <sup>2</sup>The Center for Lung and Vascular Biology, <sup>3</sup>Department of Biochemistry and Molecular Genetics, <sup>4</sup>Genome Editing Core, and <sup>5</sup>Division of Cardiology, Department of Medicine, University of Illinois College of Medicine, Chicago, IL 60612, USA.

† contributed equally to the work

For correspondence:

Asrar B. Malik PhD or Jalees Rehman MD,

E-mail: [abmalik@uic.edu](mailto:abmalik@uic.edu) or [jalees@uic.edu](mailto:jalees@uic.edu)

### Supplementary Figure Legends

**Figure S1.** Full length gels for Figure 1B. Immunoblotting of Tie2 protein in vector control, Tie2 knockout HLMVECs induced by CRISPR-Cas9 (sgRNA Tie2-1, sgRNA Tie2-2), and mouse Tie2 overexpression in Tie2<sup>-/-</sup> HLMVECs (HuTie2KO1 + mTie2, HuTie2KO2 + mTie2,). The pictures of target proteins (chemiluminescence) and protein ladder standards (fluorescence) can only be taken separately by ImageQuant LAS 4000 software. GAPDH was used as the loading control.

Figure S1

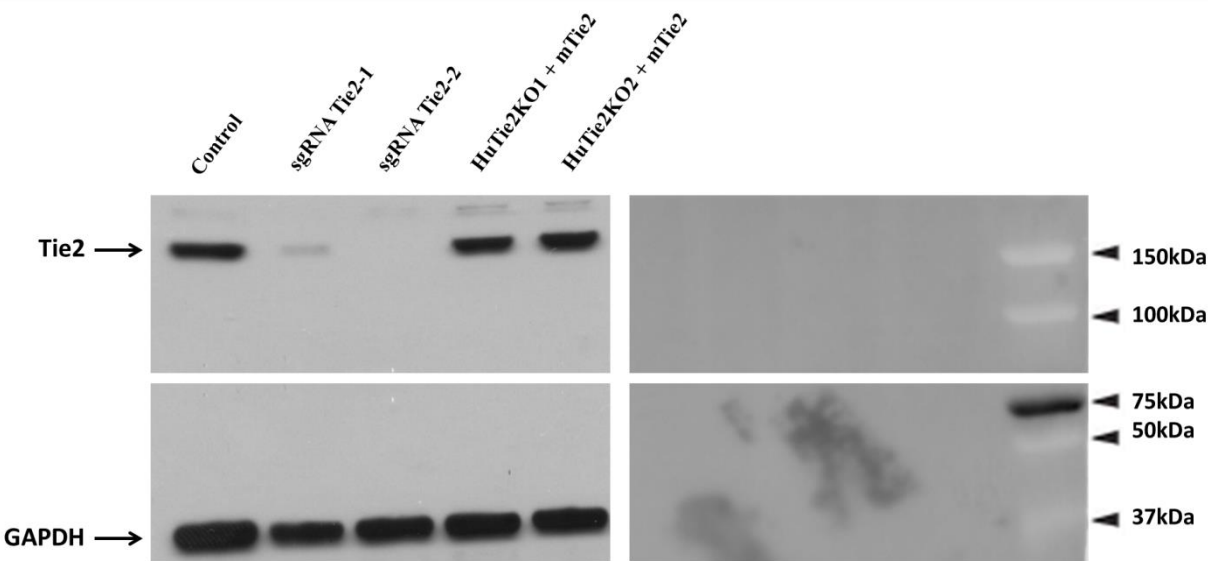

Supplement: srep42127-s1.pdf [file srep42127-s1.pdf]
